# Supplementary material for: Reduction–oxidation pathways involved in cancer development: a systematic review of literature reviews
Source: PubMed Central journal article supplement (PMC5584299; doi:10.18632/oncotarget.17128), 2017-04-16
Supplement: oncotarget-08-51888-s001.pdf [file oncotarget-08-51888-s001.pdf]

# Reduction–oxidation pathways involved in cancer development: a systematic review of literature reviews

## Supplementary Materials

### Appendix

#### Table of contents

|                                     |   |
|-------------------------------------|---|
| Appendix A - Literature search..... | 1 |
| Appendix B - Excluded reviews.....  | 2 |
| Appendix C - Included reviews.....  | 8 |

### Appendix A – Literature search

#### Medline literature search:

| Steps | Search field | Search string                | Hits       |
|-------|--------------|------------------------------|------------|
| #1    | MeSH Terms   | neoplasms                    | 2,765,954  |
| #2    | MeSH Terms   | oxidative stress             | 90,523     |
| #3    | MeSH Terms   | free radical                 | 244,301    |
| #4    | MeSH Terms   | signal transduction          | 433,482    |
| #5    |              | #2 OR #3                     | 301,990    |
| #6    |              | #1 AND #4 AND #5             | 2,662      |
| #7    | Filter       | Review                       | 2,089,688  |
| #8    | Filter       | Humans                       | 15,665,093 |
| #9    |              | #6 AND #7 AND #8 AND #9      | 505        |
| #10   | Date - MeSH  | “2005/01/01” to “2015/10/22” | 9,379,389  |
| #11   |              | #9 AND #10                   | 406        |

## Appendix B – Excluded reviews with low information quality score

1. Agani, F. and B.H. Jiang, *Oxygen-independent regulation of HIF-1: novel involvement of PI3K/AKT/mTOR pathway in cancer*. *Curr Cancer Drug Targets*, 2013. **13**(3): p. 245-51.
2. Baird, L. and A.T. Dinkova-Kostova, *The cytoprotective role of the Keap1-Nrf2 pathway*. *Archives of Toxicology*, 2011. **85**(4): p. 241-272.
3. Bauer, A.K., T. Hill, III, and C.-M. Alexander, *The Involvement of NRF2 in Lung Cancer*. *Oxidative Medicine and Cellular Longevity*, 2013.
4. Bauer, G., *Targeting extracellular ROS signaling of tumor cells*. *Anticancer Res*, 2014. **34**(4): p. 1467-82.
5. Bernard, D. and D. Vindrieux, *PLA2R1: Expression and function in cancer*. *Biochimica Et Biophysica Acta-Reviews on Cancer*, 2014. **1846**(1): p. 40-44.
6. Blanchetot, C. and J. Boonstra, *The ROS-NOX connection in cancer and angiogenesis*. *Crit Rev Eukaryot Gene Expr*, 2008. **18**(1): p. 35-45.
7. Block, K. and Y. Gorin, *Aiding and abetting roles of NOX oxidases in cellular transformation*. *Nat Rev Cancer*, 2012. **12**(9): p. 627-37.
8. Brierley, D.J. and S.A. Martin, *Oxidative Stress and the DNA Mismatch Repair Pathway*. *Antioxidants & Redox Signaling*, 2013. **18**(18): p. 2420-2428.
9. Bubic, C., et al., *The NF-kappa B-mediated control of ROS and JNK signaling*. *Histology and Histopathology*, 2006. **21**(1): p. 69-80.
10. Budanov, A.V., *Stress-Responsive Sestrins Link p53 with Redox Regulation and Mammalian Target of Rapamycin Signaling*. *Antioxidants & Redox Signaling*, 2011. **15**(6): p. 1679-1690.
11. Chen, F., K. Beezhold, and V. Castranova, *Tumor promoting or tumor suppressing of NF-kappa B, a matter of cell context dependency*. *Int Rev Immunol*, 2008. **27**(4): p. 183-204.
12. Cheng, H., et al., *Nitric oxide in cancer metastasis*. *Cancer Lett*, 2014. **353**(1): p. 1-7.
13. Chowdhury, I., W.E. Thompson, and K. Thomas, *Prohibitins Role in Cellular Survival Through Ras-Raf-MEK-Erk Pathway*. *Journal of Cellular Physiology*, 2014. **229**(8): p. 998-1004.
14. Clerkin, J.S., et al., *Mechanisms of ROS modulated cell survival during carcinogenesis*. *Cancer Lett*, 2008. **266**(1): p. 30-6.
15. Cosentino-Gomes, D., N. Rocco-Machado, and J.R. Meyer-Fernandes, *Cell signaling through protein kinase C oxidation and activation*. *Int J Mol Sci*, 2012. **13**(9): p. 10697-721.
16. Costa, A., A. Scholer-Dahirel, and F. Mechta-Grigoriou, *The role of reactive oxygen species and metabolism on cancer cells and their microenvironment*. *Semin Cancer Biol*, 2014. **25**: p. 23-32.
17. Diaz, B. and S.A. Courtneidge, *Redox signaling at invasive microdomains in cancer cells*. *Free Radic Biol Med*, 2012. **52**(2): p. 247-56.
18. Draganescu, C., et al., *Unravelling the connection between metabolism, cell growth and cancer*. *Medecine Nucleaire-Imagerie Fonctionnelle et Metabolique*, 2015. **39**(1): p. 59-63.
19. Essick, E.E. and F. Sam, *Oxidative stress and autophagy in cardiac disease, neurological disorders, aging and cancer*. *Oxidative Medicine and Cellular Longevity*, 2010. **3**(3): p. 168-177.
20. Felty, Q., *Redox sensitive Pyk2 as a target for therapeutics in breast cancer*. *Front Biosci (Landmark Ed)*, 2011. **16**: p. 568-77.
21. Fogg, V.C., N.J. Lanning, and J.P. Mackeigan, *Mitochondria in cancer: at the crossroads of life and death*. *Chin J Cancer*, 2011. **30**(8): p. 526-39.

22. Fruehauf, J.P. and F.L. Meyskens, Jr., *Reactive oxygen species: a breath of life or death?* Clin Cancer Res, 2007. **13**(3): p. 789-94.
23. Giles, G.I., *The redox regulation of thiol dependent signaling pathways in cancer.* Curr Pharm Des, 2006. **12**(34): p. 4427-43.
24. Giudice, A. and M. Montella, *Activation of the Nrf2-ARE signaling pathway: a promising strategy in cancer prevention.* Bioessays, 2006. **28**(2): p. 169-81.
25. Grant, G.E., J. Rokach, and W.S. Powell, *5-Oxo-EETE and the OXE receptor.* Prostaglandins Other Lipid Mediat, 2009. **89**(3-4): p. 98-104.
26. Greer, E.L. and A. Brunet, *FOXO transcription factors at the interface between longevity and tumor suppression.* Oncogene, 2005. **24**(50): p. 7410-7425.
27. Grek, C.L. and K.D. Tew, *Redox metabolism and malignancy.* Curr Opin Pharmacol, 2010. **10**(4): p. 362-8.
28. Grimm, E.A., A.G. Sikora, and S. Ekmekcioglu, *Molecular pathways: inflammation-associated nitric-oxide production as a cancer-supporting redox mechanism and a potential therapeutic target.* Clin Cancer Res, 2013. **19**(20): p. 5557-63.
29. Gruening, N.-M., H. Lehrach, and M. Ralser, *Regulatory crosstalk of the metabolic network.* Trends in Biochemical Sciences, 2010. **35**(4): p. 220-227.
30. Gueron, G., A. De Siervi, and E. Vazquez, *Advanced prostate cancer: reinforcing the strings between inflammation and the metastatic behavior.* Prostate Cancer Prostatic Dis, 2012. **15**(3): p. 213-21.
31. Hayes, P. and U.G. Knaus, *Balancing reactive oxygen species in the epigenome: NADPH oxidases as target and perpetrator.* Antioxid Redox Signal, 2013. **18**(15): p. 1937-45.
32. Hess, J., P. Angel, and M. Schorpp-Kistner, *AP-1 subunits: quarrel and harmony among siblings.* J Cell Sci, 2004. **117**(Pt 25): p. 5965-73.
33. Ishdorj, G., L. Li, and S.B. Gibson, *Regulation of autophagy in hematological malignancies: role of reactive oxygen species.* Leuk Lymphoma, 2012. **53**(1): p. 26-33.
34. Jaganjac, M., *Possible involvement of granulocyte oxidative burst in Nrf2 signaling in cancer.* Indian Journal of Medical Research, 2010. **131**(5): p. 609-616.
35. Jaramillo, M.C. and D.D. Zhang, *The emerging role of the Nrf2-Keap1 signaling pathway in cancer.* Genes & Development, 2013. **27**(20): p. 2179-2191.
36. Jiang, P., W. Du, and M. Wu, *Regulation of the pentose phosphate pathway in cancer.* Protein & Cell, 2014. **5**(8): p. 592-602.
37. Kamata, T., *Roles of Nox1 and other Nox isoforms in cancer development.* Cancer Sci, 2009. **100**(8): p. 1382-8.
38. Kang, J.-H., *Protein Kinase C (PKC) Isozymes and Cancer.* New Journal of Science, 2014. **2014**(2014): p. 36.
39. Katoh, Y. and M. Katoh, *FGFR2-related pathogenesis and FGFR2-targeted therapeutics.* International Journal of Molecular Medicine, 2009. **23**(3): p. 307-311.
40. Kelley, M.R., M.M. Georgiadis, and M.L. Fishel, *APE1/Ref-1 role in redox signaling: translational applications of targeting the redox function of the DNA repair/redox protein APE1/Ref-1.* Curr Mol Pharmacol, 2012. **5**(1): p. 36-53.
41. Kensler, T.W., N. Wakabayash, and S. Biswal, *Cell survival responses to environmental stresses via the Keap1-Nrf2-ARE pathway,* in *Annual Review of Pharmacology and Toxicology.* 2007. p. 89-116.
42. Lau, A., et al., *Dual roles of Nrf2 in cancer.* Pharmacological Research, 2008. **58**(5-6): p. 262-270.

43. Lebedzinska-Arciszewska, M., et al., *The interplay between p66Shc, reactive oxygen species and cancer cell metabolism*. Eur J Clin Invest, 2015. **45 Suppl 1**: p. 25-31.
44. Leon, L., J.F. Jeannin, and A. Bettaieb, *Post-translational modifications induced by nitric oxide (NO): implication in cancer cells apoptosis*. Nitric Oxide, 2008. **19(2)**: p. 77-83.
45. Li, L., G. Ishdorj, and S.B. Gibson, *Reactive oxygen species regulation of autophagy in cancer: implications for cancer treatment*. Free Radic Biol Med, 2012. **53(7)**: p. 1399-410.
46. Lontos, M., et al., *The tumor suppressor gene ARF as a sensor of oxidative stress*. Curr Mol Med, 2012. **12(6)**: p. 704-15.
47. Liou, G.Y. and P. Storz, *Reactive oxygen species in cancer*. Free Radic Res, 2010. **44(5)**: p. 479-96.
48. Liu, B., L. Qu, and S. Yan, *Cyclooxygenase-2 promotes tumor growth and suppresses tumor immunity*. Cancer Cell Int, 2015. **15**: p. 106.
49. Liu, H., et al., *An unconventional role of BMP-Smad1 signaling in DNA damage response: a mechanism for tumor suppression*. J Cell Biochem, 2014. **115(3)**: p. 450-6.
50. Liu, W., et al., *Targeted genes and interacting proteins of hypoxia inducible factor-1*. Int J Biochem Mol Biol, 2012. **3(2)**: p. 165-78.
51. Lopez-Lazaro, M., *Role of Oxygen in Cancer: Looking Beyond Hypoxia*. Anti-Cancer Agents in Medicinal Chemistry, 2009. **9(5)**: p. 517-525.
52. Low, I.C.C., J. Kang, and S. Pervaiz, *Bcl-2: A Prime Regulator of Mitochondrial Redox Metabolism in Cancer Cells*. Antioxidants & Redox Signaling, 2011. **15(12)**: p. 2975-2987.
53. Lu, J., et al., *Oxidative Stress and Lectin-Like Ox-LDL-Receptor LOX-1 in Atherogenesis and Tumorigenesis*. Antioxidants & Redox Signaling, 2011. **15(8)**: p. 2301-2333.
54. Lu, J., L.K. Sharma, and Y. Bai, *Implications of mitochondrial DNA mutations and mitochondrial dysfunction in tumorigenesis*. Cell Res, 2009. **19(7)**: p. 802-15.
55. Luo, J.L., H. Kamata, and M. Karin, *The anti-death machinery in IKK/NF-kappa B signaling*. Journal of Clinical Immunology, 2005. **25(6)**: p. 541-550.
56. Ma, Z. and K. Vosseller, *Cancer Metabolism and Elevated O-GlcNAc in Oncogenic Signaling*. Journal of Biological Chemistry, 2014. **289(50)**: p. 34457-34465.
57. Macleod, K.F., *The role of the RB tumour suppressor pathway in oxidative stress responses in the haematopoietic system*. Nat Rev Cancer, 2008. **8(10)**: p. 769-81.
58. Maiese, K., et al., *Clever cancer strategies with FoxO transcription factors*. Cell Cycle, 2008. **7(24)**: p. 3829-3839.
59. Martinez-Outschoorn, U., F. Sotgia, and M.P. Lisanti, *Tumor microenvironment and metabolic synergy in breast cancers: critical importance of mitochondrial fuels and function*. Semin Oncol, 2014. **41(2)**: p. 195-216.
60. Martinez-Outschoorn, U.E., M.P. Lisanti, and F. Sotgia, *Catabolic cancer-associated fibroblasts transfer energy and biomass to anabolic cancer cells, fueling tumor growth*. Semin Cancer Biol, 2014. **25**: p. 47-60.
61. Martinez-Sanchez, G. and A. Giuliani, *Cellular redox status regulates hypoxia inducible factor-1 activity. Role in tumour development*. J Exp Clin Cancer Res, 2007. **26(1)**: p. 39-50.
62. Mates, J.M., et al., *Oxidative stress in apoptosis and cancer: an update*. Arch Toxicol, 2012. **86(11)**: p. 1649-65.
63. Maynard, S., et al., *Base excision repair of oxidative DNA damage and association with cancer and aging*. Carcinogenesis, 2009. **30(1)**: p. 2-10.

64. Mehrotra, S., et al., *Oxidative Stress and Lymphocyte Persistence: Implications in Immunotherapy*, in *Advances in Cancer Research*, Vol 102, G.F.V. Woude and G. Klein, Editors. 2009. p. 197-227.
65. Mellier, G. and S. Pervaiz, *The three Rs along the TRAIL: resistance, re-sensitization and reactive oxygen species (ROS)*. *Free Radic Res*, 2012. **46**(8): p. 996-1003.
66. Menna, C., et al., *Lipoxygenase inhibitors for cancer prevention: promises and risks*. *Curr Pharm Des*, 2010. **16**(6): p. 725-33.
67. Miller, T.W., J.S. Isenberg, and D.D. Roberts, *Molecular regulation of tumor angiogenesis and perfusion via redox signaling*. *Chem Rev*, 2009. **109**(7): p. 3099-124.
68. Moscat, J. and M.T. Diaz-Meco, *p62: a versatile multitasker takes on cancer*. *Trends Biochem Sci*, 2012. **37**(6): p. 230-6.
69. Nezis, I.P. and H. Stenmark, *p62 at the interface of autophagy, oxidative stress signaling, and cancer*. *Antioxid Redox Signal*, 2012. **17**(5): p. 786-93.
70. Nogueira, V. and N. Hay, *Molecular pathways: reactive oxygen species homeostasis in cancer cells and implications for cancer therapy*. *Clin Cancer Res*, 2013. **19**(16): p. 4309-14.
71. North, S., M. Moenner, and A. Bikfalvi, *Recent developments in the regulation of the angiogenic switch by cellular stress factors in tumors*. *Cancer Lett*, 2005. **218**(1): p. 1-14.
72. Nourazarian, A.R., P. Kangari, and A. Salmaninejad, *Roles of Oxidative Stress in the Development and Progression of Breast Cancer*. *Asian Pacific Journal of Cancer Prevention*, 2014. **15**(12): p. 4745-4751.
73. Ostrakhovitch, E.A., *Redox Environment and its Meaning for Breast Cancer Cells Fate*. *Current Cancer Drug Targets*, 2011. **11**(4): p. 479-495.
74. Pan, J.S., M.Z. Hong, and J.L. Ren, *Reactive oxygen species: a double-edged sword in oncogenesis*. *World J Gastroenterol*, 2009. **15**(14): p. 1702-7.
75. Pascucci, B., et al., *Role of nucleotide excision repair proteins in oxidative DNA damage repair: an updating*. *Biochemistry-Moscow*, 2011. **76**(1): p. 4-15.
76. Patra, K.C. and N. Hay, *The pentose phosphate pathway and cancer*. *Trends in Biochemical Sciences*, 2014. **39**(8): p. 347-354.
77. Perl, A., et al., *Oxidative stress, inflammation and carcinogenesis are controlled through the pentose phosphate pathway by transaldolase*. *Trends in Molecular Medicine*, 2011. **17**(7): p. 395-403.
78. Quaegebeur, A. and P. Carmeliet, *Oxygen Sensing: A Common Crossroad in Cancer and Neurodegeneration*, in *Diverse Effects of Hypoxia on Tumor Progression*, M.C. Simon, Editor. 2010. p. 71-103.
79. Rajendran, M., et al., *p66Shc-a longevity redox protein in human prostate cancer progression and metastasis*. *Cancer and Metastasis Reviews*, 2010. **29**(1): p. 207-222.
80. Reuter, S., et al., *Oxidative stress, inflammation, and cancer: how are they linked?* *Free Radic Biol Med*, 2010. **49**(11): p. 1603-16.
81. Riganti, C., et al., *The pentose phosphate pathway: An antioxidant defense and a crossroad in tumor cell fate*. *Free Radical Biology and Medicine*, 2012. **53**(3): p. 421-436.
82. Rojas-Rivera, D. and C. Hetz, *TMBIM protein family: ancestral regulators of cell death*. *Oncogene*, 2015. **34**(3): p. 269-80.
83. Roy, K., et al., *NADPH oxidases and cancer*. *Clin Sci (Lond)*, 2015. **128**(12): p. 863-75.
84. Sardina, J.L., et al., *Reactive oxygen species: are they important for haematopoiesis?* *Crit Rev Oncol Hematol*, 2012. **81**(3): p. 257-74.

85. Sauer, H. and M. Wartenberg, *Reactive oxygen species as signaling molecules in cardiovascular differentiation of embryonic stem cells and tumor-induced angiogenesis*. *Antioxid Redox Signal*, 2005. **7**(11-12): p. 1423-34.
86. Saw, C.L.L. and A.-N.T. Kong, *Nuclear factor-erythroid 2-related factor 2 as a chemopreventive target in colorectal cancer*. *Expert Opinion on Therapeutic Targets*, 2011. **15**(3): p. 281-295.
87. Seki, E., D.A. Brenner, and M. Karin, *A Liver Full of JNK: Signaling in Regulation of Cell Function and Disease Pathogenesis, and Clinical Approaches*. *Gastroenterology*, 2012. **143**(2): p. 307-320.
88. Semenza, G.L., *Regulation of cancer cell metabolism by hypoxia-inducible factor 1*. *Seminars in Cancer Biology*, 2009. **19**(1): p. 12-16.
89. Sesti, F., et al., *Oxidative stress-mediated biomolecular damage and inflammation in tumorigenesis*. *In Vivo*, 2012. **26**(3): p. 395-402.
90. Shiota, M., A. Yokomizo, and S. Naito, *Oxidative stress and androgen receptor signaling in the development and progression of castration-resistant prostate cancer*. *Free Radic Biol Med*, 2011. **51**(7): p. 1320-8.
91. Singleton, D.C. and A.L. Harris, *Targeting the ATF4 pathway in cancer therapy*. *Expert Opinion on Therapeutic Targets*, 2012. **16**(12): p. 1189-1202.
92. Slattery, M.L. and F.A. Fitzpatrick, *Convergence of Hormones, Inflammation, and Energy-Related Factors: A Novel Pathway of Cancer Etiology*. *Cancer Prevention Research*, 2009. **2**(11): p. 922-930.
93. Sosa, V., et al., *Oxidative stress and cancer: An overview*. *Ageing Research Reviews*, 2013. **12**(1): p. 376-390.
94. Storz, P., *Reactive oxygen species in tumor progression*. *Front Biosci*, 2005. **10**: p. 1881-96.
95. Sullivan, R. and C.H. Graham, *Chemosensitization of cancer by nitric oxide*. *Curr Pharm Des*, 2008. **14**(11): p. 1113-23.
96. Susnow, N., et al., *Bcl-2 family proteins as regulators of oxidative stress*. *Seminars in Cancer Biology*, 2009. **19**(1): p. 42-49.
97. Svilar, D., et al., *Base Excision Repair and Lesion-Dependent Subpathways for Repair of Oxidative DNA Damage*. *Antioxidants & Redox Signaling*, 2011. **14**(12): p. 2491-2507.
98. Taguchi, K., H. Motohashi, and M. Yamamoto, *Molecular mechanisms of the Keap1-Nrf2 pathway in stress response and cancer evolution*. *Genes Cells*, 2011. **16**(2): p. 123-40.
99. Tang, S., et al., *The role of oxidized ATM in the regulation of oxidative stress-induced energy metabolism reprogramming of CAFs*. *Cancer Lett*, 2014. **353**(2): p. 133-44.
100. Tao, R., et al., *Regulation of MnSOD enzymatic activity by Sirt3 connects the mitochondrial acetylome signaling networks to aging and carcinogenesis*. *Antioxid Redox Signal*, 2014. **20**(10): p. 1646-54.
101. Tudek, B., *Base excision repair modulation as a risk factor for human cancers*. *Molecular Aspects of Medicine*, 2007. **28**(3-4): p. 258-275.
102. Tuncer, S. and S. Banerjee, *Eicosanoid pathway in colorectal cancer: Recent updates*. *World J Gastroenterol*, 2015. **21**(41): p. 11748-66.
103. Turpaev, K.T., *Keap1-Nrf2 signaling pathway: Mechanisms of regulation and role in protection of cells against toxicity caused by xenobiotics and electrophiles*. *Biochemistry-Moscow*, 2013. **78**(2): p. 111-126.
104. Tzivion, G., M. Dobson, and G. Ramakrishnan, *FoxO transcription factors; Regulation by AKT and 14-3-3 proteins*. *Biochimica Et Biophysica Acta-Molecular Cell Research*, 2011. **1813**(11): p. 1938-1945.

105. Valko, M., et al., *Free radicals, metals and antioxidants in oxidative stress-induced cancer*. Chem Biol Interact, 2006. **160**(1): p. 1-40.
106. Vandenberghe, P., et al., *The role of the kinases RIP1 and RIP3 in TNF-induced necrosis*. Sci Signal, 2010. **3**(115): p. re4.
107. Vriend, J. and R.J. Reiter, *The Keap1-Nrf2-antioxidant response element pathway: A review of its regulation by melatonin and the proteasome*. Molecular and Cellular Endocrinology, 2015. **401**(C): p. 213-220.
108. Wallace, D.C., *Mitochondria and cancer: Warburg addressed*. Cold Spring Harb Symp Quant Biol, 2005. **70**: p. 363-74.
109. Wang, Z., Y. Li, and F.H. Sarkar, *Signaling mechanism(s) of reactive oxygen species in Epithelial-Mesenchymal Transition reminiscent of cancer stem cells in tumor progression*. Curr Stem Cell Res Ther, 2010. **5**(1): p. 74-80.
110. Weinberg, F. and N.S. Chandel, *Reactive oxygen species-dependent signaling regulates cancer*. Cell Mol Life Sci, 2009. **66**(23): p. 3663-73.
111. Wu, W.S., *The signaling mechanism of ROS in tumor progression*. Cancer Metastasis Rev, 2006. **25**(4): p. 695-705.
112. Wu, W.S., J.R. Wu, and C.T. Hu, *Signal cross talks for sustained MAPK activation and cell migration: the potential role of reactive oxygen species*. Cancer Metastasis Rev, 2008. **27**(2): p. 303-14.
113. Wu, Y., et al., *Molecular mechanisms underlying chronic inflammation-associated cancers*. Cancer Lett, 2014. **345**(2): p. 164-73.
114. Yang, W., et al., *Redox regulation of cancer metastasis: molecular signaling and therapeutic opportunities*. Drug Dev Res, 2014. **75**(5): p. 331-41.
115. Yang, Y., et al., *Reactive oxygen species in cancer biology and anticancer therapy*. Curr Med Chem, 2013. **20**(30): p. 3677-92.
116. Zhang, C., et al., *Cancer may be a pathway to cell survival under persistent hypoxia and elevated ROS: A model for solid-cancer initiation and early development*. International Journal of Cancer, 2015. **136**(9): p. 2001-2011.
117. Zhang, L., Z. Yang, and Y. Liu, *GADD45 proteins: roles in cellular senescence and tumor development*. Experimental Biology and Medicine, 2014. **239**(7): p. 773-778.
118. Zhang, S., et al., *Homeostasis of redox status derived from glucose metabolic pathway could be the key to understanding the Warburg effect*. American Journal of Cancer Research, 2015. **5**(4): p. 1265-1280.
119. Zhang, Y., et al., *FoxO family members in cancer*. Cancer Biology & Therapy, 2011. **12**(4): p. 253-259.
120. Zheng, Q., J. Ye, and J. Cao, *Translational regulator eIF2 alpha in tumor*. Tumor Biology, 2014. **35**(7): p. 6255-6264.

## Appendix C – Included reviews

High-quality reviews scored with 6 point or more in information quality score

| No. | Authors                           | Year | Described pathway(s)  | Redox regulation        | Mechanism(s) leading to cancer | Component of pathway(s) | Interaction with other pathways | Overall score          |
|-----|-----------------------------------|------|-----------------------|-------------------------|--------------------------------|-------------------------|---------------------------------|------------------------|
|     |                                   |      |                       | Max. possible points: 3 | Max. possible points: 3        | Max. possible points: 2 | Max. possible points: 2         | Max. possible score:10 |
| 1   | Aggarwal, B.B., et al.            | 2006 | NF-κB                 | 1.5                     | 1.5                            | 1.5                     | 2.0                             | 6.5                    |
| 2   | Bansal, M. and Kaushal, N.        | 2014 | Redox signaling       | 3.0                     | 0.0                            | 2.0                     | 2.0                             | 7.0                    |
| 3   | Barthel, A. and Klotz, L. O.      | 2005 | PI3K                  | 2.5                     | 1.0                            | 1.0                     | 1.5                             | 6.0                    |
| 4   | Bogdan, C.                        | 2015 | NOS                   | 3.0                     | 0.0                            | 2.0                     | 1.0                             | 6.0                    |
| 5   | Bourgeais, J., et al.             | 2013 | STAT                  | 2.5                     | 2.5                            | 1.0                     | 1.5                             | 7.5                    |
| 6   | Brigelius-Flohe, R. and Flohe, L. | 2011 | Transcription factors | 2.5                     | 1.5                            | 1.0                     | 1.0                             | 6.0                    |
| 7   | Chiarugi, P.                      | 2005 | PTP and PTK           | 3.0                     | 1.0                            | 1.0                     | 1.5                             | 6.5                    |
| 8   | Dhillon, A. S., et al.            | 2007 | MAPK                  | 1.5                     | 3.0                            | 1.5                     | 1.0                             | 7.0                    |
| 9   | Duan, C.                          | 2016 | HIF-3                 | 2.5                     | 2.0                            | 0.5                     | 1.0                             | 6.0                    |
| 10  | Eferl, R. and Wagner, E. F.       | 2003 | AP-1                  | 1.0                     | 3.0                            | 1.5                     | 1.0                             | 6.5                    |
| 11  | Fukumura, D., et al.              | 2006 | NOS                   | 2.0                     | 2.5                            | 1.0                     | 1.0                             | 6.5                    |
| 12  | Furstenberger, G., et al          | 2006 | COX and LOX           | 2.0                     | 2.0                            | 1.0                     | 1.0                             | 6.0                    |
| 13  | Galanis, A., et al.               | 2008 | HIF-1                 | 3.0                     | 2.0                            | 0.5                     | 1.5                             | 7.0                    |
| 14  | Garg, R., et al.                  | 2014 | PKC                   | 1.0                     | 3.0                            | 2.0                     | 0.5                             | 6.5                    |
| 15  | Giorgi, C., et al.                | 2010 | PKC                   | 2.5                     | 1.5                            | 1.0                     | 2.0                             | 7.0                    |
| 16  | Gocek, E., et al.                 | 2014 | NRTK                  | 0.5                     | 2.5                            | 2.0                     | 1.0                             | 6.0                    |
| 17  | Holmstrom, K. M. and Finkel, T.   | 2014 | ROS/RNS sources       | 2.5                     | 1.5                            | 1.0                     | 2.0                             | 7.0                    |
| 18  | Jiang, F., et al.                 | 2011 | NOX                   | 2.0                     | 1.0                            | 1.0                     | 2.0                             | 6.0                    |
| 19  | Kappelmann, M., et al.            | 2014 | AP-1                  | 1.0                     | 2.5                            | 1.5                     | 1.0                             | 6.0                    |
| 20  | Karamouzis, M. V., et al.         | 2007 | AP-1                  | 0.0                     | 2.5                            | 1.5                     | 2.0                             | 6.0                    |
| 21  | Kim, E. K. and Choi, E.-J.        | 2015 | MAPK                  | 1.5                     | 2.5                            | 1.0                     | 1.0                             | 6.0                    |
| 22  | Knab, L. M., et al.               | 2014 | COX and LOX           | 1.5                     | 2.5                            | 1.0                     | 1.0                             | 6.0                    |



| No. | Authors                         | Year | Described pathway(s)                          | Redox regulation        | Mechanism(s) leading to cancer | Component of pathway(s) | Interaction with other pathways | Overall score          |
|-----|---------------------------------|------|-----------------------------------------------|-------------------------|--------------------------------|-------------------------|---------------------------------|------------------------|
|     |                                 |      |                                               | Max. possible points: 3 | Max. possible points: 3        | Max. possible points: 2 | Max. possible points: 2         | Max. possible score:10 |
| 23  | Korbecki, J., et al.            | 2013 | COX                                           | 2.5                     | 0.5                            | 1.5                     | 2.0                             | 6.5                    |
| 24  | Kotsinas, A., et al.            | 2012 | p53                                           | 2.5                     | 2.5                            | 1.0                     | 0.0                             | 6.0                    |
| 25  | Ladelfa, M. F., et al.          | 2011 | p53, PI3K, Wnt/ $\beta$ -catenin, HIF-1, MAPK | 2.5                     | 1.5                            | 1.0                     | 1.5                             | 6.5                    |
| 26  | Landry, W. D. and Cotter, T. G. | 2014 | NOX                                           | 2.5                     | 2.5                            | 1.0                     | 1.0                             | 7.0                    |
| 27  | Leinonen, H. M., et al.         | 2014 | Nrf2                                          | 1.5                     | 2.0                            | 2.0                     | 2.0                             | 7.5                    |
| 28  | Liu, W. and Phang, J. M.        | 2012 | Proline dehydrogenase                         | 2.5                     | 2.0                            | 0.5                     | 1.5                             | 6.5                    |
| 29  | MacDonald, B. T., et al.        | 2009 | Wnt/ $\beta$ -catenin                         | 2.0                     | 2.0                            | 2.0                     | 1.5                             | 7.5                    |
| 30  | Maillet, A. and Pervaiz, S.     | 2012 | p53                                           | 2.5                     | 2.5                            | 0.5                     | 2.0                             | 7.5                    |
| 31  | Martini, M., et al.             | 2014 | PI3Ks                                         | 1.5                     | 2.5                            | 1.5                     | 1.0                             | 6.5                    |
| 32  | McCubrey, J. A., et al.         | 2006 | MAPK                                          | 2.5                     | 1.5                            | 1.5                     | 1.0                             | 6.5                    |
| 33  | Meitzler, J. L., et al.         | 2014 | NOX                                           | 2.5                     | 2.5                            | 1.0                     | 1.0                             | 7.0                    |
| 34  | Monga, S. P.                    | 2011 | Wnt/ $\beta$ -catenin                         | 1.5                     | 2.5                            | 1.5                     | 1.0                             | 6.5                    |
| 35  | Movafagh, S., et al.            | 2015 | HIF-1                                         | 2.5                     | 1.5                            | 1.0                     | 1.0                             | 6.0                    |
| 36  | Myatt, S. S., et al.            | 2011 | FOXO                                          | 2.5                     | 2.5                            | 1.0                     | 0.5                             | 6.5                    |
| 37  | Na, H. K. and Surh, Y. J.       | 2014 | Nrf2                                          | 2.0                     | 1.5                            | 1.0                     | 1.5                             | 6.0                    |
| 38  | Nakanishi, A., et al.           | 2014 | PI3K                                          | 2.0                     | 1.5                            | 1.5                     | 1.0                             | 6.0                    |
| 39  | Oeckinghaus, A. and Ghosh, S.   | 2009 | NF- $\kappa$ B                                | 2.5                     | 1.5                            | 1.5                     | 1.0                             | 6.5                    |
| 40  | Ostman, A., et al.              | 2006 | PTP                                           | 2.0                     | 1.5                            | 1.0                     | 1.5                             | 6.0                    |
| 41  | Pani, G. and Galeotti, T.       | 2011 | P53                                           | 2.5                     | 1.5                            | 1.0                     | 2.0                             | 7.0                    |
| 42  | Parri, M. and Chiarugi, P.      | 2013 | PTK, PTP, P53, Nrf2, Nf-kB                    | 2.5                     | 2.5                            | 1.0                     | 1.0                             | 7.0                    |
| 43  | Qin, F., et al.                 | 2013 | Protein kinase Hippo                          | 2.0                     | 2.0                            | 1.5                     | 0.5                             | 6.0                    |
| 44  | Regad, T.                       | 2015 | RTKs                                          | 1.0                     | 2.5                            | 1.5                     | 1.5                             | 6.5                    |
| 45  | Saito-Diaz, K., et al.          | 2013 | Wnt/ $\beta$ -catenin                         | 1.5                     | 2.0                            | 2.0                     | 1.0                             | 6.5                    |

| No. | Authors                          | Year | Described pathway(s) | Redox regulation        | Mechanism(s) leading to cancer | Component of pathway(s) | Interaction with other pathways | Overall score          |
|-----|----------------------------------|------|----------------------|-------------------------|--------------------------------|-------------------------|---------------------------------|------------------------|
|     |                                  |      |                      | Max. possible points: 3 | Max. possible points: 3        | Max. possible points: 2 | Max. possible points: 2         | Max. possible score:10 |
| 46  | Samanta, D. and Datta, P.K.      | 2012 | Smad                 | 0.5                     | 2.5                            | 2.0                     | 1.0                             | 6.0                    |
| 47  | Sarkar, F. H., et al.            | 2008 | NF-κB                | 2.0                     | 2.0                            | 1.0                     | 1.0                             | 6.0                    |
| 48  | Shelton, P. and Jaiswal, A. K.   | 2013 | Nrf2                 | 2.5                     | 1.0                            | 0.5                     | 2.0                             | 6.0                    |
| 49  | Speed, N. and Blair, I. A.       | 2011 | COX and LOX          | 2.0                     | 2.0                            | 1.0                     | 1.0                             | 6.0                    |
| 50  | Storz, P.                        | 2011 | FOXO                 | 2.5                     | 1.5                            | 1.0                     | 2.0                             | 7.0                    |
| 51  | Tell, G., et al.                 | 2009 | APE1/Ref-1           | 3.0                     | 1.0                            | 0.5                     | 2.0                             | 6.5                    |
| 52  | Thakur, S., et al.               | 2014 | APE1/Ref-1           | 1.5                     | 1.5                            | 1.0                     | 2.0                             | 6.0                    |
| 53  | Tokarz, P. and Blasiak, J.       | 2014 | Mitochondria         | 1.5                     | 2.5                            | 1.0                     | 1.0                             | 6.0                    |
| 54  | Tonks, N. K.                     | 2006 | PTP                  | 1.5                     | 2.5                            | 2.0                     | 0.5                             | 6.5                    |
| 55  | Vannini, F., et al.              | 2015 | NOS                  | 2.0                     | 2.5                            | 1.0                     | 1.0                             | 6.5                    |
| 56  | Verschoor, M. L., et al.         | 2010 | Est-1                | 2.5                     | 2.5                            | 1.0                     | 0.5                             | 6.5                    |
| 57  | Vurusaner, B., et al.            | 2012 | P53, FOXO            | 2.5                     | 2.5                            | 0.0                     | 1.0                             | 6.0                    |
| 58  | Wagner, E. F. and Nebreda, A. R. | 2009 | MAPK                 | 2.0                     | 3.0                            | 1.0                     | 1.0                             | 7.0                    |
| 59  | Wallace, D. C.                   | 2012 | Mitochondria         | 2.5                     | 2.5                            | 0.0                     | 1.5                             | 6.5                    |
| 60  | Watroba, M., et al.              | 2012 | FOXO                 | 2.5                     | 1.0                            | 1.0                     | 1.5                             | 6.0                    |
| 61  | Xiang, M., et al.                | 2014 | Nrf2                 | 2.0                     | 2.5                            | 1.0                     | 0.5                             | 6.0                    |
| 62  | Yang, Q. and Lee, J. D.          | 2011 | MAPK                 | 0.5                     | 3.0                            | 1.5                     | 1.0                             | 6.0                    |
| 63  | Yousefi, B., et al.              | 2014 | PI3K                 | 1.5                     | 2.5                            | 1.0                     | 1.0                             | 6.0                    |
| 64  | Yu, H., et al.                   | 2009 | STAT                 | 0.5                     | 3.0                            | 2.0                     | 1.5                             | 7.0                    |
| 65  | Zhao, J., et al.                 | 2015 | HIF-2                | 1.5                     | 2.5                            | 1.0                     | 1.0                             | 6.0                    |

Abbreviations: AP-1, Activator protein 1; APE1/Ref-1, Apurinic/aprimidinic endonuclease 1/Redox effector factor-1; COX, Cyclooxygenase; FOXO, Forkhead box O; HIF, Hypoxia-inducible factors; LOX, Lipoxygenase; MAPK, Mitogen-activated protein kinase; NF-κB, Nuclear factor-κB; NOS, Nitric oxide synthase; NOX, NADPH oxidase; Nrf2, Nuclear factor E2-related factor 2; P53, Tumor protein p53; PI3K, Phosphoinositide 3-kinase; PKC, Protein kinase C; PTK, Protein tyrosine kinase; PTP, protein tyrosine phosphatase; ROS, Reactive oxygen species; Smad, Small mothers against decapentaplegic; STAT, Signal transducer and activator of transcription.
